# Supplementary material for: Biodegradable composites of poly(propylene carbonate) mixed with silicon nitride for osteogenic activity of adipose-derived stem cells and repair of bone defects
Source: Royal Society of Chemistry journal article supplement (doi:10.1039/d3tb00017f), 2023-01-01
Supplement: d3tb00017f1.pdf [file d3tb00017f1.pdf]

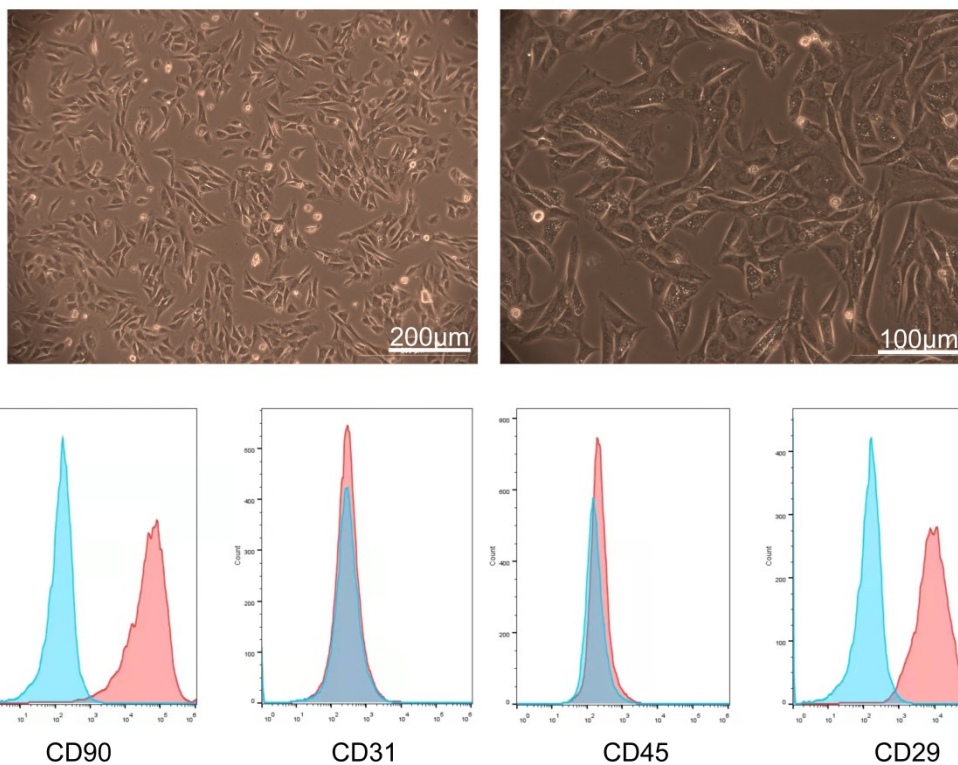

**S.1** Morphological observation of ADSCs and characterization of flow cytometry (positive expression of CD90 and CD29; negative expression of CD31 and CD45).

---

|          |                                                       |
|----------|-------------------------------------------------------|
| DAPDH(F) | Order NO. B662204,Sangon Biotech,Rat GAPDH Endogenous |
| GAPDH(R) | Reference Genes Primers                               |
| RUNX2(F) | CCTGAACTCAGCACCAAGTCCT                                |
| RUNX2(R) | TCAGAGGTGGCAGTGTCATCA                                 |
| COL1(F)  | AGAGGCATAAAGGGTCATCGTG                                |
| COL1(R)  | AGACCGTTGAGTCCATCTTTGC                                |
| OPN(F)   | CCAGCCAAGGACCAACTACA                                  |
| OPN(R)   | AGTGTTTGCTGTAATGCGCC                                  |

---

**T.1** Primer information
